# Supplementary material for: Time-resolved measurements of the densities of individual frozen hydrometeors and of fresh snowfall
Source: Copernicus journal article supplement (doi:10.5194/amt-2023-148), 2023-08-18
Supplement: Supplementary file [file amt-2023-148-AC2-supplement.pdf]

## Responses to Reviewer 2

We thank the reviewer for their efforts. Clearly the reviewer spent a lot of time evaluating our paper, and all the comments helped improve the explanation and writing of the manuscript.

**Comment 1:** Eq. (1) --- Issues and questions. The term representing the heat required to increase the temperature is  $m \cdot C_w \cdot T_{p,max}$ . The specific heat of water  $C_w$  is different for ice and for liquid water. This fact seems completely neglected. No value for  $C_w$  is given.

**Response 1:** These terms were all included in the analysis, but not explicitly written in the paper. We have added all energy terms in detail and explained each term in the revision.

**Added to manuscript: [L 55-80]** The mass  $m$  of an individual snowflake is obtained by applying energy conservation to a control volume surrounding each hydrometeor on the hotplate. The heat gained by a snowflake from the heated plate is assumed to be equivalent to the heat required to increase the snowflake's internal energy plus the heat lost during melting and evaporation as described by the following equation

$$mC_{ice}(T_0 - T_{ice}) + mL_f + mC_{liq}(T_p - T_0) + mL_v = \kappa \int_0^{\Delta t_{evap}} (T_p - T_h(t)) A(t) dt \dots (R1)$$

Here,  $m$  is the mass of an individual frozen hydrometeor,  $C_{ice}$  is the specific heat of ice,  $T_{ice}$  is initial temperature of a frozen hydrometeor,  $T_0 = 0^\circ\text{C}$ ,  $L_f = 3.34 \times 10^5 \text{ Jkg}^{-1}$  is the latent heat of fusion of water, and  $L_v = 2.32 \pm 0.02 \times 10^6 \text{ Jkg}^{-1}$  is the latent heat of vaporization of water (see Appendix A1),  $C_{liq} = 4.18 \times 10^3 \text{ Jkg}^{-1}\text{K}^{-1}$  is the specific heat of liquid water,  $A(t)$  is the area of each frozen hydrometeor and water droplet at time  $t$ ,  $T_p$  is the surface temperature of the hotplate during evaporation and it is constant with time, and  $T_h(t)$  is the temperature of the frozen hydrometeor and/or water droplet at time  $t$  on the hotplate.  $\Delta t_{evap}$  is the time required to melt and evaporate a hydrometeor, and  $\kappa$  is an empirical device-specific calibration coefficient (related to the amount of heat that passes through the metal hotplate to individual hydrometeors per unit time through a unit area with a temperature gradient of one degree) determined to  $7.01 \pm 0.01 \times 10^3 \text{ W m}^{-2} \text{ K}^{-1}$  (equivalent to  $(k/d)_{eff}$  in Singh et al. 2021), which is independent of particle size and environmental conditions. In Eq. (1), the area of a hydrometer at any time  $t$  can be written as  $A(t) = A_{ice}(t) + A_{liq}(t)$ , where  $A_{ice}(t)$  is the unmelted area of a hydrometeor at time  $t$  and  $A_{liq}(t)$  is the melted area of a hydrometer at time  $t$ . After substituting  $A(t)$  in , Eq. (1), Eq. (1) may be re-written as

$$mC_{ice}(T_0 - T_{ice}) + mL_f + mC_{liq}(T_p - T_0) + mL_v = \kappa \int_0^{\Delta t_{melt}} (T_p - T_{ice}(t)) A_{ice}(t) dt + \kappa \int_{t_0}^{\Delta t_{evap}} (T_p - T_h(t)) A_{liq}(t) dt \dots (R2)$$

Here,  $t=0$  corresponds to when a frozen hydrometeor hits the hotplate and  $t=t_0$  is when the thermal camera sees the liquid portion for the first time.  $t_0$  is the time lag between the melting and evaporation start times, respectively, which is about 0.1 s for the laboratory ice particles tested and negligible for snowflakes observed using our typical thermal-camera recording frame rates.

Note that the thermal camera can be adjusted to selectively 'see' particles on the hotplate in specific temperature ranges (see section 3). To more easily evaluate Eq. (2)), the camera is set to only see hydrometeors on the hotplate after melting. Hence,  $A_{ice}(t) = 0$  for  $T_h(t) < 0^\circ\text{C}$  and  $\kappa \int_0^{\Delta t_{melt}} (T_p - T_{ice}(t)) A_{ice}(t) dt = 0$ , which is equal to  $mC_{ice}(T_0 - T_{ice}) + mL_f$ . This trick allows us to remove both terms from Eq. (2), which yields

$$m = \frac{\kappa}{(C_{liq}T_p + L_v)} \int_0^{\Delta t_{evap}} (T_p - T_w(t)) A(t) dt \dots \dots \dots (R3)$$

Here, the lower integration bound is rest so that  $t_0 = 0$  such that Eq (3) is evaluated for liquid phase only.  $T_w(t)$  is the water droplet temperature at time  $t$ .

**Comment 2:** Further, I would expect a temperature difference in this term, the amount by which the hydrometeor’s temperature is increased. Instead there is  $T_{p,max}$ , which is explained as “maximum surface temperature of the hotplate”. It is unclear what  $T_{p,max}$  is and why it is used in this term.

**Response 2:** Based on the thermal camera setting, all frozen hydrometeors have initial temperature is  $0^\circ\text{C}$  and it reaches maximum temperature  $T_p$ . Hence, temperature difference for all frozen hydrometeors during the measurement period (evaporation) is  $T_p$ .

**Added to Manuscript: [L -80]** Note that the initial and final temperature of all frozen hydrometeors is  $T_0 = 0^\circ\text{C}$  and  $T_p$  respectively during evaporation.

**Comments 3:** Assuming that  $T_{p,max}$  is the temperature difference by which the hydrometeor’s temperature is increased, then this implies or assumes that the whole hydrometeor ( $m$ ) actually increases by this amount. Is this assumption ok, i.e. does most of the evaporation (and consequential decrease in  $m$ ) happen when the melted hydrometeor reaches its highest temperature?

**Response 3:** To address this issue, a time series of the temperature of a frozen hydrometeor going through its evaporation process is shown in Fig. R1. It shows that typically,  $\sim 98\%$  of the evaporation happens at the highest temperature. And, a similar assumption was made during the calibration of  $k/d_{eff}$ , which reduces uncertainties.

**Added in Manuscript:[L-80]** ... and more than  $\sim 98\%$  of the mass evaporates at the highest temperature ( $\sim T_p$ ). This is illustrated in the time series of the temperature of an evaporating hydrometeor given in Fig. R1

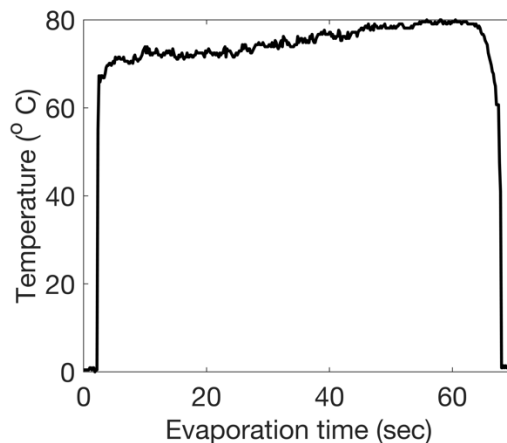

Figure R1. Time series of the temperature of the melted portion of the ice particle after being placed on the hotplate.  $60\ \mu\text{L}$  water droplet volume was used to make ice particle for this test.

**Comment 4:** The temperature  $T_w(t)$  is the “temperature of the water droplet at time  $t$ ”, whereas area  $A(t)$  is the “area of each snowflake at time  $t$ ”. Why does one refer to a droplet and the other to a snowflake?

**Response 4:** Thank you. It has been corrected.

**Comment 5:** How is “area” A defined?

**Response 5:** Area (A) was measured by counting pixels on the hotplate after **melting** and a detailed explanation is given in Singh et al. (2021). Note that the difference in area measured before and after melting of a hydrometeor is less than 3% as illustrated in Fig. 2a. We compute the area before melting by setting the temperature range of the thermal camera to [-40,0]°C in post-processing. Note that when the temperature range is [-40,0]°C, un-melted hydrometeors have a good contrast against the hotplate (background) and allow us to easily count pixels.

**Comment 6:** The equation includes melting and evaporation. This is clear only from  $Leq = Lv + Lf$  being the sum of the latent heats of fusion and vaporization. The integral in the equation is from time  $t=0$  to  $\Delta t_{evap}$ , “the time required to evaporate the water droplet”. It is unclear if melting is neglected in this integral or if melting starts at  $t=0$ , i.e. if the integral includes melting and evaporation. Does evaporation also start at  $t=0$  or does it start when melting is finished (at  $t = \Delta t_{melt}$ )?

**Response 6:** This has been explained above in **Comment 1**, which states that we have not neglected melting. Here is one example: As you can see in Fig. 2a, the time series of ice area before and after melting start at  $t \sim 0$ . In Fig 2a, observation of evaporation starts at  $t = 0.1$ s (based on the thermal camera recording speed 10 fps). At  $t=0$ , the area of ice is  $\sim 2 \text{ cm}^2$ , and area of melted ice is  $\sim 0 \text{ cm}^2$ . At  $t \sim 4$  s, area of ice is  $\sim 0 \text{ cm}^2$ , and area of melted ice is  $\sim 2 \text{ cm}^2$ . Evaporation started at  $\sim 0$  s. At  $t = \Delta t_{melt}$  ( $\sim 4$  s), melted ice reached at  $\sim T_p$  (Fig. 2b).

**Added in Manuscript:[caption figure 2]:** The lag between melting and evaporation start time is 0.1 s, which is equal to the thermal camera sampling period.

**Comments 7:**  $\kappa$  is determined by evaporating droplets of known mass (in Singh et al. 2021, water droplets of 20 $\mu$ L). The “empirical calibration coefficient”  $\kappa$  seems to represent the specific heat capacity of the contact area between hotplate and melted hydrometeor.  $\kappa$  is  $(k/d)_{eff}$  in Singh et al. 2021, who call this the calibrated value of the term  $k_w/d_w$  in their equation for R2 (in text; for R2 see their Fig 2 and Eq 15) without mentioning anywhere what  $k_w$  and  $d_w$  are.

**Response 7:**  $\kappa$  is the amount of heat that passes through a metal plate to water droplets per unit of time through a unit area with a temperature gradient of one degree. Singh et al. 2021, in Eq. (15), R1 and R2 are the thermal resistance across the aluminum plate and water droplet, respectively, where  $k_{AL}$  and  $d_{AL}$  are thermal conductivity and thickness of the aluminum plate. Similarly,  $k_w$  and  $d_w$  are parameters for water droplets on the aluminum plate but values of  $k_w$  and  $d_w$  are not known. Hence, we calibrated  $k/d_{eff}$  values.

**Added in Manuscript: [L 65].** The amount of heat that passes through a metal plate to water droplets per unit of time through a unit area with a temperature gradient of one degree

**Comment 8:**  $\kappa$  is determined only for liquid droplets and only for one size. Is  $\kappa$  a constant that can be applied to frozen and liquid hydrometeors as done in Eq. (1)?

Melting neglected in Eq. (1)??

Initially, at deposition at  $t=0$ , the contact is at a few points only. Most likely it takes a very short time for a liquid layer to form at the hotplate, which provides the contact area needed to apply Eq. (1).

**Response 8:**  $\kappa$  is a constant independent of particle size and environmental conditions added in manuscript line 65. and  $\kappa$  is an empirical device-specific calibration coefficient (related to the amount of heat that passes through the metal hotplate to individual hydrometeors per unit time through a unit area with a temperature gradient of one degree). As discussed in Eq. (3) above, Eq. (3) only works for frozen and liquid hydrometeors after melting. Therefore,  $\kappa$  value works for both frozen and liquid

hydrometeors. We agree that the melting process is very short and area of ice between deposition at  $t=0$  and  $t=\Delta t_{evap}$  are provided in Fig. 2a and only after the melting area is required in Eq. (2).

**Comment 9:** Heat lost from the hydrometeor or melted hydrometeor is neglected. This is not mentioned, motivated or discussed.

**Response 9:** Now this is discussed from line 60 to 75 in the manuscript.

**Eq. (2) --- Issues and questions**

**Comment 10:** The time varying temperature difference from Eq. (1) is replaced with the constant  $\Delta T_{evap}$  referring to Rees et al. 2021, who should be demonstrating that this can be done. I could not see that Rees et al. 2021 motivate this in any way, they simply do the same substitution from one equation to the next. As with Eq. (1), it is unclear if the integral starting at  $t=0$  includes melting or only shows evaporation. In the former case, Fig2b shows that the temperature difference cannot be approximated as constant. In the latter case, the integral is over the time range in white in Fig2b and the temperature difference  $\Delta T_{evap}$  may be approximated as constant.

**Response 10:** The mass of hydrometeors is calculated using time varying temperature difference Eq. (3)

$$m = \frac{\kappa}{(C_{liq}T_p + L_v)} \int_0^{\Delta t_{evap}} (T_p - T_w(t)) A(t) dt \dots \dots \dots (R4)$$

and mean temperature difference

$$m = \frac{\kappa}{(C_{liq}T_p + L_v)} \Delta T_{evap} \int_0^{\Delta t_{evap}} A(t) dt \dots \dots \dots (R5)$$

The mass from both equations matches well, within 2 % error, which is within uncertainty measurement in mass (Note that for calibration of  $\kappa$  in Eq. (R5))  $\Delta T_{evap}$  was used and is a consistent method to reduce uncertainty in the measurements). Where,  $(\Delta T_{evap} = \overline{(T_p - T_{liq}(t))})$ . As we discussed earlier, Eq. (R3) only required evaporation parameters and measured mass using time varying temperature difference and mean temperature difference for the Fig 2 dataset and the results show 1.6 % error. Regardless, we are not using above approximation for calculation of mass and density. We have removed the Eq. (2). Note that Fig 2 b shows minimum temperature of ice particle during melting.

**Comment 11:** The “particle’s effective thickness in the direction normal to the hotplate  $h$ ” seems to be defined as the height of the quasi hemispherical “droplet” on the hotplate (Fig1). Why is this called “effective” thickness? The melting speed relates  $h$  and the time required to “melt an individual snowflake”. How is  $h$  defined for a “frozen hydrometeor”?

**Response 11:** Sorry for this confusion. In Fig1a,  $h$  was the maximum thickness of the hemispherical ice particle, which has been replaced with radius ( $R$ ) in Fig 1a. The effective thickness of hemispherical ice particles and snowflakes is defined as Volume = Area x effective thickness ( $A_p h$ ). In the case of a hemisphere,  $V (\frac{2\pi}{3} R^3) = A(\pi R^2) \times (2R/3)$ , where  $h = 2R/3$  is effective thickness of hemisphere. We have modified Fig.1a. The effective thickness of frozen hydrometeors is illustrated in Fig1a,b. The method is also explained in the text on lines 120-135.

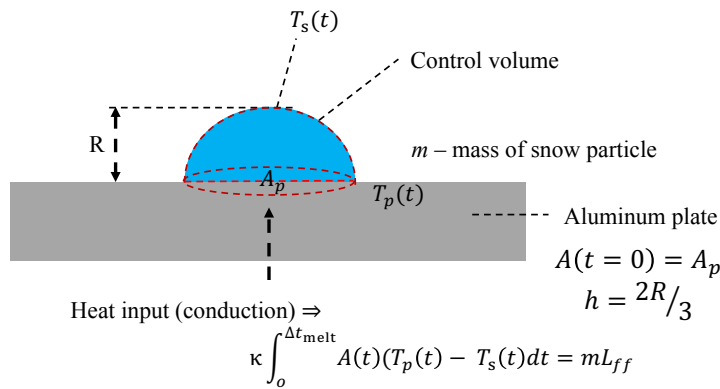

(a) 
$$v_{melt} = \frac{h}{\Delta t_{melt}} = c_{melt} \Delta T_{melt} \quad \text{at all environmental conditions}$$

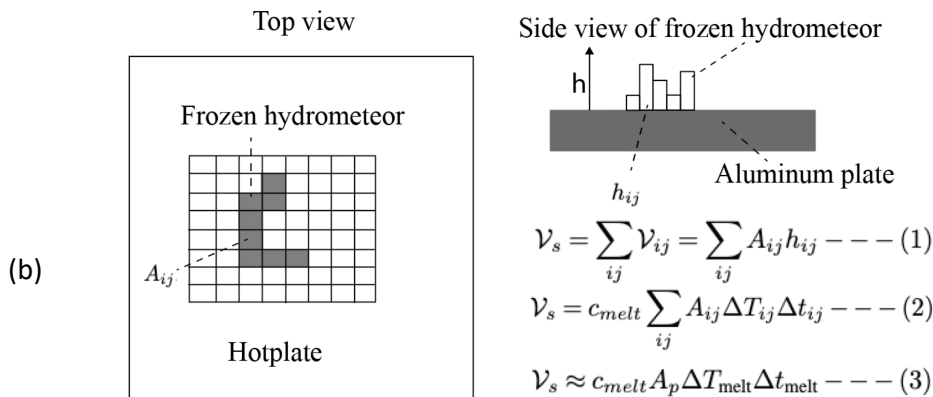

Figure R2 (a) Schematic of heat transfer from an aluminum hotplate to a solid hydrometeor during melting.  $R$  is the radius, and  $A_p$  is the base area of hydrometeor on the hotplate.  $h$  is the effective thickness of the hemisphere that is  $2R/3$ . For the methodology presented here, a control volume is defined to wrap around the hydrometeor. (b) Schematic of calculation of volume, area, and height of frozen hydrometeors on the hotplate.

**Comment 12:** Eq. (3) implies that the “volume of a snowflake” is  $A_p * h$ .

When  $P_0$  is later determined (Sects 3.1/3.2 and Sect 4.1), frozen quasi-hemispherical solid ice pellets are used. As an example, one size is generated from water droplets of  $60\mu\text{L}$  volume and stated to have a measured height  $h$  of  $1.95\text{mm}$  and area  $A$  (why is this not called not  $A_p$ ?) of  $0.502\text{ cm}^2$  (L278-279). The volume of these ice pellets is thus (according to  $A_p * h$ )  $98\mu\text{L}$ . This cannot be explained by the lower ice density and shows that  $A_p * h$  is not the volume of these ice particles. However, this volume is what Eq. (3) is based on. This then affects the following equations too, in particular Eqs (7) and (8), which are used to determine the density of a frozen hydrometeor.

**Response 12:** Here,  $A$  is replaced by  $A_p$ . The volume of the hemisphere  $= \frac{2\pi}{3} R^3 = A \frac{2R}{3} = 0.502 (2 * 1.95/3) = 65\ \mu\text{L}$ . Also, these values were for ice particles after melting, which is corrected on Lines 190-195, and Table 1 has been added to section 3.1 where the area and height of each sample of ice particles are included.

### **Comment 13: Eq (4) --- Issues and questions**

L\_ff should be L\_f?

The equation refers only to melting. It seems to implicitly approximate the temperature difference between hotplate and frozen part of hydrometeor as constant  $\Delta T_{melt}$ . Is this justified? I am not sure when looking at Fig2b (the grey part).

What happens to the integral? Why have an integral over A over a constant 1 and not write out what that is? How you get to that integral is also unclear. There seem to be implicit assumption that are not mentioned.

**Response 13:**  $L_f$  is the latent heat of fusion of ice, while  $L_{ff}$  is the total energy required to melt ice particles,  $L_{ff} = mC_{ice}(T_0 - T_{ice}) + mL_f$ ; this has been added to the manuscript on Line 105. We agree that the temperature difference between the hotplate and the frozen part of the hydrometeor is not constant and varies with time. We address this in the response to **Comment 10**. Results show within 2% uncertainty between the time series of temperature difference and mean value of time series of temperature difference ( $\Delta T_{melt} = \overline{(T_p - T_{ice}(t))}$ ).

**Added in Manuscript:** We define  $\Delta T_{melt} = \overline{(T_p - T_{ice}(t))}$  Where t varies from 0 to  $\Delta t_{melt}$ . We have re-defined melting velocity using temperature differences across hotplate and frozen hydrometeor in lines 105-115. Additional information for calculation of volume of frozen hydrometeor is provided in Line 125-130 using  $\Delta T_{melt}$ .

### **Comment 14: Eq (5) --- Issues and questions**

The concept of “the ‘effective mechanical work rate’ or mechanical power ... required to melt a snowflake” is not adequately introduced, in particular the “constant ‘melting pressure’”  $P_0$ . Apparently  $P_0$  was found to be constant empirically, and these equations (Eq.5) represent the attempt to derive that with some integrals that seem mathematically dubious. It is unclear what integrals over  $V_s$  or  $A \cdot h$  between  $t=0$  and  $\Delta t_{melt}$  as it is mathematically wrong. As with Eq. (4), there seem to be implicit assumptions not mentioned, and the unresolved integral over A appears.

**Response 14:** This work interpretation has been removed in favor of a straightforward empirical description, and the manuscript has been updated. In addition, we carefully looked through the integrals to make sure they have been corrected. Thank you for the keen eye!

**Added to manuscript:** [L 105-135]. We propose a method to measure  $v_{melt}$  as a function of the temperature difference across a hydrometeor ( $\Delta T_{melt}$ ) -- and hence the heat-transfer rate -- as illustrated in Fig. 1a. During the time it takes to melt a snowflake,  $\Delta t_{melt}$ , a hydrometeor receives a quantity of energy equal to  $mL_{ff} = mC_{ice}(T_0 - T_{ice}) + mL_f$  (that is, the sum of the internal energy per unit mass of a frozen hydrometeor and its latent heat of fusion) from the hotplate, which is independent of density of frozen hydrometeors.  $v_{melt}$  is associated with conductive heat flux rate ( $\kappa \Delta T_{melt}$ ) from the hotplate to the frozen hydrometeors during melting. We hypothesize that  $v_{melt}$  as a function of the temperature difference across a hydrometeor ( $\Delta T_{melt}$ ), and we may write the  $v_{melt}$  as

$$v_{melt} = c_{melt} \Delta T_{melt} \quad (R6)$$

where  $\Delta T_{melt} = \overline{T_p - T_s(t)}$  during the melting process and  $T_s(t)$  is the surface temperature of the frozen portion of the particle during melting and  $c_{melt}$  is a constant determined experimentally (see section 4.1) Now, if  $v_{melt}$ , from Eq. (4) is substituted into Eq. (3) the MS density equation can now be written as

$$\rho_{MS} = \frac{m}{c_{melt} A_p \Delta T_{melt} \Delta t_{melt}} \quad (R7)$$

The melting parameter  $\Delta t_{melt}$  is quite short for low-density snowflakes, and hence requires high-frequency recording of thermal images resulting in the generation of a tremendous amount of data, which is not convenient for field experiments.

In field experiments, the DEID measures  $\Delta t_{evap}$ , which is much longer than  $\Delta t_{melt}$ . Fortunately, a relation between  $\Delta t_{melt}$  and  $\Delta t_{evap}$  can be easily derived using experimental data (see Appendix A). By estimating the average conductive heat-transfer rate during the melting and evaporation processes, we may substitute  $\Delta T_{melt} \Delta t_{melt} \approx (L_{ff}/L_{vv}) \Delta T_{evap} \Delta t_{evap}$  into Eq. (5), which yields

$$\rho_{MS} = c \frac{m}{A_p \Delta T_{evap} \Delta t_{evap}} \quad (R8)$$

Here, the constant  $c$  is given by

$$c = \frac{L_{ff}}{L_{vv} c_{melt}} \quad (Ksm^{-1})$$

which is derived from a combination of thermodynamic and laboratory calibration constants that must be determined experimentally (see section 4.1).

In practice, Eq. (6) is evaluated following the methodology shown in Fig. 1b. Snowflakes of complex shapes do not have simple height relationships like  $h = 2R/3$  as shown in Fig. 1a. Hence, a method is required to determine the height and volume of every pixel within a snowflake. If  $A_{ij}$  is taken as the area of  $ij^{th}$  pixel,  $h_{ij}$  the height of a frozen hydrometeor normal to the hotplate that is associated with the  $ij^{th}$  pixel, and  $V_{ij}$  is the volume of  $ij^{th}$  pixel, then we may write

$$V_s = \sum_{ij} V_{ij} = \sum_{ij} A_{ij} h_{ij} = c_{melt} \sum_{ij} A_{ij} \Delta T_{ij} \Delta t_{ij}$$

which can then be estimated using the MS method on a pixel by pixel basis. Here,  $\Delta T_{ij}$  is the temporal mean temperature difference across  $ij^{th}$  pixel,  $\Delta t_{ij}$  is the melting time of the  $ij^{th}$  pixel and  $c_{melt}$  is calibration constant of melting velocity. This study used Eq. (9) to calibrate laboratory ice particles and compare snowflake habits. For field observations, we make the following simplification to determine the volume

$$\begin{aligned} V_s &= c_{melt} A_p \frac{1}{n} \sum_{ij} \Delta T_{ij} \Delta t_{ij} \approx c_{melt} A_p \Delta t_{melt} \frac{1}{n} \sum_{ij} \Delta T_{ij} = c_{melt} A_p \Delta t_{melt} \Delta T_{melt} \\ &= \frac{1}{c} A_p \Delta t_{evap} \Delta T_{evap} \end{aligned}$$

Here,  $A_p = n A_{ij}$  (assuming all pixels have the same area),  $n$  is the total number of a pixels associated with a frozen hydrometeor,  $\Delta T_{melt} = \frac{1}{n} \sum_{ij} \Delta T_{ij}$  is the spatial and temporal mean temperature difference across a frozen hydrometeor during melting,  $\Delta t_{melt} \approx \Delta t_{ij}$  is the melting time of a frozen hydrometeor and  $c = \frac{L_{ff}}{L_{vv} c_{melt}}$ .

**Comment 15:** Eq (6)-(9) --- Issues and questions

These equations follow from the above equations, i.e. they are based on the assumptions and approximations of those so that it is difficult to see under which conditions they apply and/or how the density  $\rho_{MS}$  is implicitly defined. See also the issues regarding Eq (3) about interpretation of volume and definition of  $h$ .

One assumption used to derive Eq. (8) from Eq (7) is the substitution shown in L 108 to replace  $\Delta T_{melt}$  and  $\Delta t_{melt}$  with  $\Delta T_{evap}$  and  $\Delta t_{evap}$ .

This is based on Eq (4)/Eq (A1) and Eq (A2) with all their assumptions and issues.

**Response 15:** Please see the response to **Comment 13** about Eq. (6-9). We have plotted associated with  $T_{melt} \times \Delta t_{melt}$  vs  $\Delta T_{evap} \times \Delta t_{evap}$  for ice particles and snowflakes in Appendix A2 (Fig. R3 ), which shows an approximately similar relation between melting and evaporation parameters.

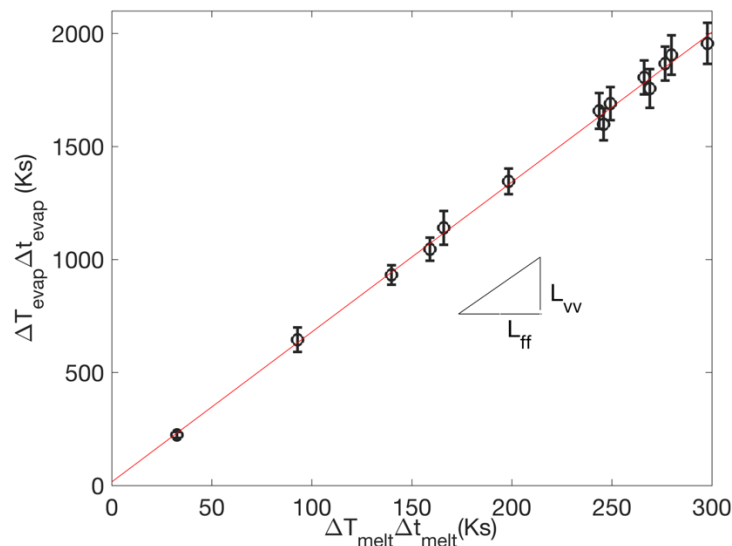

Figure R3. Experimentally measured  $\Delta T_{melt} \Delta t_{melt}$  and  $\Delta T_{evap} \Delta t_{evap}$  for laboratory ice particles. The slope of the line is quite close to  $L_{vv}/L_{ff}$ . An error bar is associated with ten samples in each ice particle size.

**Comment 16 Eq (10)-(13) --- Issues and questions:** The accumulated snow water equivalent SWE is simply the snow water equivalent rate of precipitation (from Eq. 10) times  $\Delta t_{res}$ . Why use an integral (in Eq 11) if all that is involved is a single value of  $\Delta m$  and one sampling interval  $\Delta t_{res}$ ?

**Response 16:** We agree, this has been modified as  $SWE = SWE \times \Delta t_{res}$

**Comments 17:** Eq. (12) defines an average hydrometeor density of an ensemble of hydrometeors as the sum of their masses divided by the sum of their estimated volumes. I do not agree with calling this “average density of a freshly fallen snowpack layer”. If it was the average snowpack density, then Eq. (13) describes the snow accumulation rate, as claimed. But given the definition of this average density,  $H$  from Eq. (13) is the height that one would get if all hydrometeors pack exactly (sum of volumes of hydrometeors divided by the surface over which they were collected), i.e. without effectively neither leaving any space in between them nor overlapping. In other words, I don’t agree that one can generally determine the height of the snowpack and the



accumulation rate from the volumes of the individual hydrometeors without any knowledge of how efficiently they pack.

**Response 17:** We agree with the reviewer and it has been mentioned in Lines 325-330, “The bulk density of a fresh snowpack can differ from the average density of individual snowflakes and the 1-min average because snowflake settling and compaction on the ground depends on such considerations as their settling characteristics, fall angle, wind speed, the structure of snowflakes, and the ambient temperature. We do not account for these processes in the calculation of the volume of freshly fallen snow layers as the impacts are largely unknown.” We also added Lines 155: by assuming neither leaving any space between snowflakes nor overlapping.

**Comment 18 - DEID laboratory set-up:** The DEID is described briefly here, the previous publication about the DEID and its method (Singh et al. 2021) should contain the details. The set-up, however, is flexible and in this Manuscript is described as a hotplate of 9 cm x 6 cm that is thermally imaged using 531 pixels x 362 pixels of the thermal camera yielding a “spatial resolution” of 0.2 mm/pixel. It is, without mentioning this, assumed that the thermal imagery is looking vertically down at the hotplate. What is not mentioned here, neither for the set-up in Singh et al. 2021, is the actual inclination of around 30 degrees (see Fig 3c). Does this, and if so to what extent, affect the determination of  $A_p$  and  $A$ ?

**Response 18:** Due to the inclination of the thermal camera, the maximum error in area measurement is 1.6%, and it is corrected using the dewarping function.

**Added to manuscript:** [L180-185]. The thermal camera was looking vertically downward at the hotplate at an angle. As a result, the maximum error in area measurement is 1.6%, and the error in area was corrected using the dewarping function.

**Comments 19:** Fig 3b shows a “Side-view of a surface temperature contour plot of an ice particle obtained using the thermal camera.” Has this been obtained with the configuration shown in Fig 3c?

**Response 19:** Yes.

**Added in Manuscript: (figure caption)** ... using temperature range in thermal camera [-40,0]°C

**Comment 20 - Sample preparation:** L 164-166 describe the sample preparation to manufacture ice particles for laboratory validation. In a freezer, one of eight different known volumes is applied, using a micropipette, to “a flat silicone mold”. Is this a flat silicone sheet rather than a mould suggesting a specific shape? The formed ice particles are referred to as “hemispherical”. I guess they will be close to, but not exactly hemispherical, as can be seen, for example, from the value of  $A_p$  of 0.502 cm<sup>2</sup> (L278- 279) for ice particles produced from 60µL of liquid water (a hemisphere of liquid water would have 0.29 cm<sup>2</sup>). The shape of these sample ice particles should be better described. See also comments on volume and  $h$  regarding Eq. (3).

**Response 20:** The shape, volume, area, and height of the sample of laboratory-made ice particles are added in Table 1. The only cross-sectional area of each ice particle sample was maintained using a base silicon mold while making ice particles. The value of  $A_p$  and maximum thickness  $h$  (L 278- 279) for ice particles produced from 60µL of liquid water is corrected, which was listed for liquid water after melting.

**Table 1.** The shape of sample ice particles made in a laboratory:  $V_{\text{pipette}}$  is the volume of water applied by the pipette,  $A_p$  is the cross-sectional area of ice particles measured by the thermal camera on the hotplate, and  $h$  is the maximum thickness of ice particles determined from the laser pointer system.

| $V_{\text{pipette}}$ ( $\mu\text{L}$ ) | $A_p$ ( $\text{mm}^2$ ) | $h$ ( $\text{mm}$ ) |
|----------------------------------------|-------------------------|---------------------|
| 5                                      | $5.65 \pm 0.09$         | $1.21 \pm 0.07$     |
| 10                                     | $9.10 \pm 0.09$         | $1.64 \pm 0.03$     |
| 20                                     | $13.90 \pm 0.11$        | $2.23 \pm 0.08$     |
| 30                                     | $17.60 \pm 0.09$        | $2.54 \pm 0.03$     |
| 40                                     | $22.61 \pm 0.11$        | $2.28 \pm 0.07$     |
| 50                                     | $26.81 \pm 0.17$        | $2.85 \pm 0.05$     |
| 60                                     | $31.13 \pm 0.16$        | $3.25 \pm 0.09$     |
| 70                                     | $34.56 \pm 0.14$        | $3.34 \pm 0.08$     |

**Comment 21:** Sect 3.2/Sect 4.1: what is the ambient temperature in the lab when testing environmental variability? In field evaluations (Sect 4.3) the ambient temperature varies. Do results depend on ambient temperature, which for calibrations was plus 18 degree C?

**Response 21:** The calibration constant  $\kappa$ , mass  $m$ , and Area  $A_p$  are independent of environmental variability (Singh et al. 2021), while  $\Delta t_{\text{evap}}$ ,  $\Delta t_{\text{melt}}$ ,  $v_{\text{melt}}$ ,  $\Delta T_{\text{melt}}$ ,  $\Delta T_{\text{evap}}$  parameters depend on environmental variability, and all the listed terms are measured directly during experiments. The laboratory calibration of  $v_{\text{melt}}$  was also performed at the different environmental conditions and  $v_{\text{melt}}$  was only the function of  $\Delta T_{\text{melt}}$ , which we measured directly.

**Comment 22:** L 274: “Here,  $V_{\text{pipette}}$  is volume of the ice particle created by pipetting a known volume of water.” Should  $V_{\text{pipette}}$  not be the volume of liquid water dispensed from the pipette to generate an ice particle?

**Response 22:** We agree that  $V_{\text{pipette}}$  is the water droplet volume, not ice particle volume; This has been corrected.

**Corrected in manuscript [L 305]** ... here,  $V_{\text{pipette}}$  is the volume of a water droplet, not the ice particle volume.

**Comment 23:** Sect. 4.1 last sentence (L 283-285): The “80 ice particles with different shapes and sizes” were presumably all of the same size and same shape. I am assuming this as it is in the same paragraph as the description of test particles as produced from  $60\mu\text{L}$  of liquid water. Else, what does “different shapes and sizes” refer to?

Tab 3: What is “Percentage of salt”?

**Response 23:** A different unknown shape was made by pipetting water droplets onto random surfaces with varying contact angles.

**Added in manuscript [L 315]** ... and was made by pipetting water droplets on arbitrary surfaces with different contact angles. The percentage of salt and water added is in Table 4.

**Table 4.** The density of frozen salt-water particles measured using the MS method and determined theoretically based on a salt-water ratio by weight (percentage of salt and water).

| Percentage of salt (%) | Percentage of water(%) | $\rho_{MS}$ (kg m <sup>-3</sup> ) | $\rho_{theoretical}$ (kg m <sup>-3</sup> ) |
|------------------------|------------------------|-----------------------------------|--------------------------------------------|
| 1.47                   | 98.52                  | 969 ± 37                          | 1008                                       |
| 2.75                   | 97.24                  | 988 ± 26                          | 1015                                       |
| 5.07                   | 94.92                  | 1002 ± 38                         | 1028                                       |
| 7.16                   | 92.83                  | 1018 ± 24                         | 1040                                       |
| 8.86                   | 91.13                  | 1028 ± 31                         | 1050                                       |

**Comment 24: Uncertainties** - There is no discussion of how measurement uncertainties affect the measurements of mass and density.

Errors in  $A$  as determined by thermal imagery?

Micropipette accuracy? L 152: “1.00/1.20 %/ $\mu\text{L}$ ”, what does that mean? 1% or 1% for each 1.2  $\mu\text{L}$ ; 1% or 1.2  $\mu\text{L}$  (when 1% and when 1.2  $\mu\text{L}$ )?

Accuracy of measurements of  $h$ ? Accuracy of temperature measurements?

Maybe less important: accuracy of time measurements? With 15 fps I guess error in time is on the order of 1/15 s.

**Response 24:** Systematic and Random error analysis added in Appendix A: Direct measurements made by the DEID include snowflake area, temperature, and evaporation time, for which the respective uncertainties are 1.4%, 0.3%, and 1.6%, respectively. Due to the inclination of the thermal camera, maximum error in area measurement is 1.6%, and it is corrected using Matlab’s dewarping function. The uncertainties in derived quantities (using a standard propagation of uncertainty analysis) such as mass ( $m$ ), height ( $h$ ) and density ( $\rho_{MS}$ ), are 4.3%, 2.9% and 8.6% respectively.

Micropipette accuracy updated in **L 180**: accuracy of 1% and maximum accuracy 1.2  $\mu\text{L}$  at highest volume.

**Comment 25 - Sect 3.5 --- geometrical volume estimates:** The explanation of how volume is determined is not sufficient. The quantities  $D_{min}$ ,  $D_{max}$ ,  $A$ ,  $\text{mean}(A)$ , and  $D_v$  are not defined adequately. Planar crystals are approximated as a disc. Is this disc a cylinder (as suggested by Fig 5b) or a column with base  $A_{max}$  (as suggested by the definition of  $A_{max}$  from the text)?

When referring to “the mean area of all images as illustrated in Fig. 5b”, it is not clear what exactly this refers to. The text and Fig 5b are not sufficient to precisely define  $D_{min}$ . “ $D_{reff}$ ” (L 232) should be  $D_{eff}$ ?

What is  $D_v$  (not clear from Fig 5b)?

$D_{min}$  is likely over-estimating the thickness of Planar crystal particles, as it is difficult to get the thickness from the images. The examples Planar crystal shown in Fig 5a is likely not completely planar but features some 3D structure coming out of a dominant plane.

**Response 25:** Here, planar crystals are approximated as a disc, and the volume of the disc is  $\pi R^2 h$ , where  $h \ll R$ , which is distinct from a cylinder or column.

**Added in Manuscript [L 260-265]:**  $D_{min}$  is the minimum dimension (representing the thickness of the disc) in the 2-D plane as indicated in Fig. 5a column I row V. The volume of graupel was estimated as a sphere  $V = \frac{\pi}{6} D_{Reff}^3$ , where  $D_{Reff}$  is the effective circular diameter estimated using the SLR camera imaging the snowflake falling in the air and estimated as  $D_{Reff} = \sqrt{\frac{4}{\pi} \bar{A}}$ .  $\bar{A}$  is the two-dimensional area of all images as illustrated in Fig. 5a, column II.

**Comment 26:** The units of  $c$  (L270) are not given.

**Response26:** The units of  $c$  have been added on L 115.

**Comment 27:** Fig 8b contains the mean density from “manual measurements”. This is not mentioned in the text of Sect 4.4, but likely refers to Eq. (16). Note, that this is not the same as the average density from Eq (12), see my comments regarding Eq (10)-(13).

**Response 27:** Added in the Fig 8 caption. Note that the MS method and manual measurement are compared without knowing the information about snowpack, as we mentioned earlier.

**Comments 28:** L344 in Conclusions lists “an estimate of the speed with which the particle thickness on the plate diminishes as it melts” as one of the measured variables without saying that it is the melting speed. This text is not adequate for describing melting speed. Melting speed is  $h$  divided by melting time, not the speed at which the thickness  $h$  diminishes as that may vary with time.

**Response 28:** We agree with reviewer and have corrected this in the conclusion that melting speed is  $h$  divided by the melting time.

**Comment 29:** Fig A1. Plotted times only, not products of times and temperatures ( $\Delta T_{melt} \Delta t_{melt}$  and  $\Delta T_{evap} \Delta t_{evap}$ ), as should be done according to Eq (A3)?

**Response 29:** We have corrected this and plotted Fig. A1 (Fig. R3), the product of  $\Delta T_{melt} \Delta t_{melt}$  and  $\Delta T_{evap} \Delta t_{evap}$ .

**Comments 30:** Fig B1 shows example images for aggregates. They seem to be cut (not completely imaged). Are these aggregates cut, or is this an effect of cropping when several aggregates are close to each other? It would be good to show examples with the whole hotplate indicating if several particles are observed. Are multiple particles observed falling onto the hotplate closely to each other (observed by SLR imaging) and then thermally imaged?

**Response 30:** The image shown in Fig B1 is a cropped aggregate snowflake on the hotplate just after it has melted. We have also added an entire hotplate image with snowflakes.

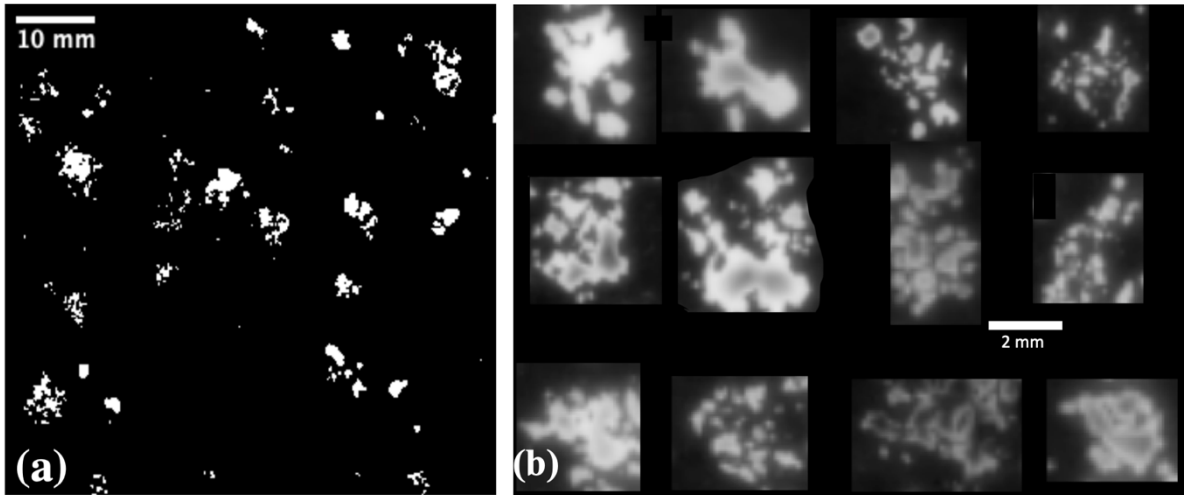

Figure R4. (a) Black and white binary thermal images of aggregate type of snowflakes in different stages of melting and evaporation on the DEID heated plate observed at Alta. (b) Cropped aggregate snowflake images on the hotplate just after melting.

The overlap is minimized by the laser-sheet thickness ( $\sim 5$  cm) and the SLR camera setting ( $160 \mu\text{m pixel}^{-1}$ ). The probability of coincidence on the hotplate depends on the precipitation rate, and negligible overlap was observed for a precipitation rate of  $\sim 1$  mm/hr, and a maximum of 4.9% coincidence probability was observed during the highest SWE rate 15.6 mm/hr, illustrated in Fig R5.

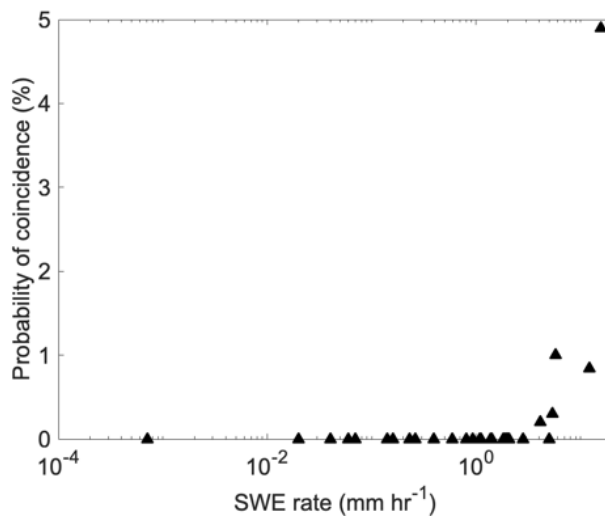

Figure R5. Probability of coincidence as a function of SWE rate.
